## 1 **Title**

2 Considerations for using multiple imputation in propensity score-weighted analysis

## 3 **Authors**

4 Andreas Halgreen Eiset\*, [aneise@rm.dk](mailto:aneise@rm.dk), Department of Affective Disorders, Aarhus

5 University Hospital, Denmark, ORCID: 0000-0002-5487-8359

6 Morten Frydenberg, [mfstat@mollerfryd.dk](mailto:mfstat@mollerfryd.dk), Ølsted, Denmark

7 \*Corresponding author

## 8 **Abstract**

9 We present our considerations for using multiple imputation to account for missing data  
10 in propensity score-weighted analysis with bootstrap percentile confidence interval. We  
11 outline the assumptions underlying each of the methods and discuss the methodological  
12 and practical implications of our choices and briefly point to alternatives. We made a  
13 number of choices *a priori* for example to use logistic regression-based propensity  
14 scores to produce “standardized mortality ratio”-weights and Substantive Model Com-  
15 patible-Full Conditional Specification to multiply impute missing data (given no viola-  
16 tion of underlying assumptions). We present a methodology to combine these methods  
17 by choosing the propensity score model based on covariate balance, using this model as  
18 the substantive model in the multiple imputation, producing and averaging the point es-  
19 timates from each multiple imputed data set to give the estimate of association and com-

20 putting the percentile confidence interval by bootstrapping. The described methodology  
21 is demanding in both work-load and in computational time, however, we do not con-  
22 sider the prior a draw-back: it makes some of the underlying assumptions explicit and  
23 the latter may be a nuisance that will diminish with faster computers and better imple-  
24 mentations.

## 25 **Introduction**

26 In this paper we present the considerations behind estimating the change in prevalence  
27 of post-traumatic stress disorder (PTSD) associated with long-distance migration using  
28 multiple imputation to handle missing data, propensity score-weighting to adjust for  
29 confounding and bootstrap to produce a percentile confidence interval. We will focus on  
30 the many statistical methodological problems we encountered and refer the reader to the  
31 accompanying paper (1) for the subject matter problem. The relevant data consisted of a  
32 20-items questionnaire and a clinical examination including assessment of possible psy-  
33 chiatric disorders, applied to a sample of Syrian asylum seekers in Denmark and a sam-  
34 ple of Syrian refugees in Lebanon. The outcome, PTSD, was assessed using the “Har-  
35 vard Trauma Questionnaire” part IV (2), giving a score from 1 to 4 with 2.5 being the  
36 commonly used cut-off-score for PTSD.

37 In a propensity score-weighted analysis you first estimate the propensity given a rele-  
38 vant set of predictors,  $Pr(E=1|Z)$ , for each individual in the study population,  $\hat{e}_i$ . The  
39 association between long-distance migration and PTSD was estimated as the prevalence  
40 among those who migrated to Denmark minus a weighted average of the prevalence of

41 PTSD among refugees who migrated to Lebanon, using weights equal to  $\hat{e}_i / (1 - \hat{e}_i)$ . This  
42 requires a number of decisions including: Which covariates to include in the propensity  
43 score model? What complexity of the model to use? How to deal with extreme weights?  
44 And how to calculate the standard error of the parameter of interest? As we had missing  
45 data in the covariates and PTSD status, we set out to combine the propensity score-  
46 weighted analysis with multiple imputation. This raised additional questions such as:  
47 What are the required assumptions of the missing data process? What is the substantial  
48 model and what variables should be included in the model? How to combine the multi-  
49 ple imputations with the propensity score analysis? How to find a valid confidence in-  
50 terval for the parameter of interest? In the following sub-sections we outline the prob-  
51 lems we had to consider and the underlying theory. In Methods we discuss our consider-  
52 ations on how to implement these in our specific study and in Results we provide details  
53 on our final implementation. The problems, theory, considerations and our decisions are  
54 summarized in Table 1, 2 and 3.

## 55 **The propensity score analysis**

56 Table 1 provides an overview of the considerations and decision for building the  
57 propensity score model. The relevant predictors to include in the propensity score model  
58 are covariates that (potentially) confound the relationship between the exposure and the  
59 outcome. The outcome itself and variables that are only associated with the exposure  
60 should not be included in the model (3). The complexity of the regression model should  
61 be examined so that balance is obtained for all covariates between exposure groups. Ex-  
62 treme weights may lead to suboptimal covariate balance and unstable estimates and are

63 most often remedied by smoothing or truncation, at the cost of potentially introducing  
64 bias (4). The estimate of association When only considering the propensity score-  
65 weighted analysis, the confidence intervals can be produced by applying some approxi-  
66 mate formula to obtain a standard error or via bootstrapping.

## 67 **Missing data**

68 The statistical properties of many missing data methods rely on the hypothesized miss-  
69 ingness mechanism. The primary interest in applied epidemiology, is whether the miss-  
70 ing data mechanism is ignorable, that is, if valid inference can be drawn despite of miss-  
71 ing data. In many applied papers using multiple imputations (MI) the authors states that  
72 the data is “missing at random” (MAR) and “as a consequence” the inference based on  
73 MI is valid. We briefly consider the definition and importance of “missing data” draw-  
74 ing primarily on Seaman *et al.*, (5). Very loosely speaking, data is MAR, if the risk of a  
75 data point being missing does not depend on the unobserved values, but only on the ob-  
76 served values. However, this is only a superficial definition. The terminology “missing  
77 at random” (MAR) and “missing completely at random” (MCAR, which imply MAR)  
78 has been in use at least since Rubin's 1976 paper (6) and was recently extended to in-  
79 clude “realized” and “everywhere” versions of both MAR and MCAR (5). In the latter  
80 paper the definition is based on parametric models for both the data,  $Z$ , (which include  
81 both outcome variable,  $Y$ , and covariates,  $X$ ) and the missingness indicator vector,  $M$ ,  
82 (which for each entry in  $z$ , specify if it is observed). Note, we do not observe the entire  
83  $z$ , but only the entries, where the corresponding entry in  $m$  is 1 and we let  $o(z, m)$  denote  
84 the observed part of the data,  $z$ . Furthermore we let  $f_{\theta}(z)$  denote the density for the data

85 and  $Pr_{\varphi}(m|z)$  the conditional probability of the missing pattern,  $m$ , given the data  $z$ , with  
 86 the parameters  $(\varphi, \theta) \in \Omega$ . In a specific study we have the realized data  $\tilde{z}$  and missing in-  
 87 dicator vector  $\tilde{m}$  with the realized observed data  $o(\tilde{z}, \tilde{m})$ .

88 Example 1. Consider a very small data set with four refugees and four variables: “year  
 89 of residency”, “sex”, “host country” and “PTSD-status”. One realization could be:

$$90 \quad \tilde{z} = \begin{bmatrix} 2013 & Male & Lebanon & PTSD \\ 2015 & Male & Lebanon & Not PTSD \\ 2015 & Female & Lebanon & Not PTSD \\ 1999 & Male & Denmark & Not PTSD \end{bmatrix} \quad \tilde{m} = \begin{bmatrix} 1 & 0 & 1 & 1 \\ 0 & 1 & 1 & 1 \\ 1 & 1 & 1 & 1 \\ 1 & 1 & 1 & 1 \end{bmatrix}$$

$$91 \quad \text{With the realised observed data } o(\tilde{z}, \tilde{m}) = \begin{bmatrix} 2013 & & Lebanon & PTSD \\ & Male & Lebanon & Not PTSD \\ 2015 & Female & Lebanon & Not PTSD \\ 1999 & Male & Denmark & Not PTSD \end{bmatrix}.$$

92 Data is said to be realized-MAR if for all  $\varphi$ ,  $Pr_{\varphi}(\tilde{m}|z) = Pr_{\varphi}(\tilde{m}|\tilde{z})$  for all  $z$ , where  
 93  $o(z, \tilde{m}) = o(\tilde{z}, \tilde{m})$  that is, the probability of the realized missingness pattern  $\tilde{m}$  is the same  
 94 for all data  $z$  that has an observed part that is identical to the realized observed data, i.e.  
 95 the unobserved part is of no interest. In Example 1, the data is realized-MAR, if the con-  
 96 ditional probability of data on “sex” for observation number 1 and data on “year of resi-  
 97 dency” for observation number 2 are missing and all other entries are observed, does not  
 98 depend on the value of the missing sex and year of residency as long as all the observed  
 99 entry is as realized. This is a statement only focusing on the realized missingness pattern  
 100 and the realized observed data; we do not consider other possible missingness patterns  
 101 or other possible realizations of the data. To emphasize: it is irrelevant whether for in-

102 stance “sex” on observation number 2 or “country” on observation number 3 could be  
103 missing,

104 The data generating process is said to be everywhere-MAR if for all  $\varphi$  and all  $m$ ,  
105  $Pr_{\varphi}(m|z) = Pr_{\varphi}(m|z')$  for all  $z$  and  $z'$ , where  $o(z, m) = o(z', m)$ . That is, data is every-  
106 where-MAR if it is realized-MAR for all possible realizations and not only for the actu-  
107 ally observed realization of the missingness pattern and data. Returning to Example 1,  
108 when assuming everywhere-MAR the realized data set is irrelevant: We have to check  
109 the whole set of possibly missing data conditional probabilities,  $Pr_{\varphi}(m|z)$  for all param-  
110 eter values,  $\varphi$ .

111 The elaborations above was necessary to qualify the question of interest: Is the missing-  
112 ness mechanism ignorable? That is, when can we make valid inference about the param-  
113 eter of interest,  $\theta$ , only based on the observed data? Seaman *et al.* (5), illustrated that the  
114 answer depends on the type of statistical inference framework and in the “frequentist  
115 likelihood framework” you need the missingness mechanism to be everywhere-MAR  
116 (and the parameters  $(\varphi, \theta)$  be variation independent, i.e  $\Omega = \Omega_{\varphi} \times \Omega_{\theta}$ ). So in order to ig-  
117 nore the missingness mechanism we have to argue that it is reasonable to assume every-  
118 where-MAR. This implies that, for all possible missingness patterns and corresponding  
119 observed data, it is reasonable to assume that the risk of that specific pattern does not  
120 depend on the value of the missing data but only of the observed data. This is of course  
121 an impossible task without some insight into why data is missing in the study. One way  
122 to start off is to assume that the missing data mechanism is identical and work indepen-

123 dently from person to person, which reduce the problem to a discussion of the mecha-  
124 nism for a single person.

125 For example, in Example 1, we have no missing in “PTSD” in the realized observed  
126 data, however, we can easily imagine this information missing in another realization of  
127 the study. If we assume identical and independent missing mechanism, we have to think  
128 of why “year of residency”, “sex”, and “PTSD” could be missing for a person and if the  
129 risk of this is independent of the unobserved values given what we have observed for  
130 that person. For example, if we only observe “country”, we have to argue, that the risk  
131 of this is the same for all individuals in each country, i.e. it does not depend on year, sex  
132 or whether or not the person has PTSD. We note that the assumption of independent  
133 missingness mechanism might easily be invalid, for example missingness could depend  
134 on some unobserved event common for several persons in the study. In the accompany-  
135 ing paper (1) we discuss the everywhere-MAR assumption in the specific study.

136 In the following, we will assume that the purpose of the data analysis is to estimate  $\beta$ ,  
137 typically a vector of regression coefficients based on the proposed model for the analy-  
138 sis of interest—i.e. the substantive model—of  $Y$  given the covariates  $X$ :  $Pr(y|x;\beta)$ .

## 139 **Multiple imputations**

140 Table 2 gives an overview of the considerations and decision for using multiple imputa-  
141 tion to deal with missing data. Many statistical methods assume no missing data or  
142 missingness mechanism MCAR and will produce biased estimates otherwise (7). A  
143 popular way to deal with missing data is to use multiple imputation which gives unbi-

144 ased estimates assuming ignorable missingness mechanism and correctly specified mul-  
145 tiple imputation model (8,9). Briefly, multiple imputation consists of producing a num-  
146 ber,  $K$ , of data sets with imputed values for the missing data and analyze these complete  
147 data sets as planned, resulting in  $K$  estimates of  $\beta$  which are combined, typically by tak-  
148 ing taking the average, into a final estimate for  $\beta$ . When implemented, the imputation is  
149 done for each variable with missing data (a) specifying a regression model for the con-  
150 ditional distribution of the variable given the other (relevant) variables (b) using the ob-  
151 served data to estimate the parameters in this model (c) impute the missing values of the  
152 variable by simulating from the Bayesian posterior predictive distribution. The last two  
153 steps will in general be taken care of by a software program, as long as the imputation  
154 regression models are chosen within the most common regression model families. Often  
155 one or several of the “predictor” variables in the imputation regression will have miss-  
156 ing values too, resulting in a so-called “chained equation”, that is, the imputed values in  
157 one variable are needed to impute the values in another variable and vice versa. Luckily,  
158 many software packages can solve this problem using iterative methods. Thus, after de-  
159 ciding on what implementation of multiple imputation to use we are left with problem  
160 (a): How to specify the imputation regression models, i.e., what should be used as the  
161 substantive model in the multiple imputation, what variables to include in the multiple  
162 imputation models and how many iterations must be run between sampling? It has been  
163 known for a while that you can introduce bias in the estimation of  $\beta$ , if you do not take  
164 care in this specification (10). This can happen if the relationship between  $y$  and  $x$  in the  
165 substantive model is more complicated than the relationship between  $x$  and  $y$  in the im-  
166 plemented imputation regression models. For example, if you do not include  $y$  in the



167 imputation regression model for the covariate  $x_i$  then the imputed data for  $x_i$  will be un-  
168 related with  $y$  and, as a consequence, you will underestimate the regression coefficient  
169  $\beta_i$  relating  $y$  to  $x_i$  in the substantive model. Furthermore, if  $x_i$  and  $x_j$  interact in the sub-  
170 stantive model for  $y$ , then  $y$  and  $x_j$  should (at least) interact in the imputation model for  
171  $x_i$  to avoid bias in the estimate of the magnitude of the interaction. It is difficult, even  
172 for relatively simple substantive models, to determine how to specify the imputation  
173 models in order to avoid this problem. Luckily there exist a statistical method that can  
174 combine a specification of the substantive regression model,  $y$  on  $x$ , with univariate re-  
175 gression models for each of the variables in  $x$  given the rest of the  $x$ 's, into an imputa-  
176 tion algorithm (11). This Substantive Model Compatible-Full Conditional Specification  
177 (SMC-FCS) algorithm has been implemented in R and Stata for a set of standard regres-  
178 sion models (12,13). As the SMC-FCS algorithm is an iterative algorithm, it will not  
179 generate independent samples. This implies that one cannot use subsequent samples but  
180 only use samples with a specific interval between them.

## 181 **Bootstrapping**

182 Table 3 gives an overview of the considerations and decision combining propensity  
183 score-weighting and multiple imputation and obtaining a valid confidence interval.  
184 Non-parametric bootstrapping is a method to find an approximate confidence interval  
185 for a parameter, when applying a specific estimation algorithm to a data set. In boot-  
186 strapping the only input is the data set and the estimation algorithm and no assumption  
187 is made concerning the distribution or the estimation algorithm. However, the realized  
188 sample is assumed to be independent and representative of the target population (14). In

189 the simple bootstrap, the estimation algorithm is applied to the original data and to a  
190 number of bootstrap samples, i.e. artificial data sets with the same number of observa-  
191 tions as the original, but with the observations being sampled randomly with replace-  
192 ment from the original data set. This results in the original estimate and a set of boot-  
193 strap estimates from which a 95% confidence interval can be produced as (a) the origi-  
194 nal estimate +/- 1.96 times the standard deviation of the bootstrap estimates or (b) the  
195 2.5th and 97.5th percentile of the bootstrap estimates. The first strategy will typical re-  
196 quire a relative small number of bootstrap samples, but rely on approximate normality  
197 of the estimates, while the second require a large number of bootstrap samples, but does  
198 not require any assumptions about the distribution of the estimates.

## 199 **Methods**

200 Based on the theoretical considerations above we outline our estimation algorithm. The  
201 analysis plan was defined *a priori* and included a number of decisions:

- 202 1) the exposure (long-distance migration), outcome (PTSD) and potential con-  
203 founders (age, sex, socioeconomic status, experienced trauma and mental well-  
204 being) (see also (1))
- 205 2) addressing of confounding by logistic regression-based propensity score model-  
206 ing and of missing data by multiple imputation
- 207 3) three propensity score models of increasing complexity were defined and three  
208 levels of weight truncation (no truncation, truncating at the 1st and 99th per-

209 centile, or truncating at the 5th and 95th percentile) were examined for covariate  
210 balance (15,16). Based on a single imputed data set for each of the three com-  
211 plexities of the propensity score model, the least complex model with the least  
212 amount of truncation to obtain acceptable balance, defined as the absolute stan-  
213 dardized difference of  $\leq 0.10$  on all covariates (15) was chosen for the analysis.  
214 See supplementary materials and Figures in (1) for details on the specific models  
215 and the exploratory plots

216 4) given ignorable missingness mechanism, the missing data were multiple im-  
217 puted using the SMC-FCS algorithm with the chosen propensity score model as  
218 the substantive model

219 5) for each of the multiply imputed data sets: the propensity scores were computed  
220 using the chosen propensity score model, converted into weights and the  
221 weighted point estimates produced

222 6) the mean of the point estimates from 5) was the estimate of interest

223 7) the 95 percentile confidence interval was produced by bootstrapping steps 4-6 a  
224 large number of times.

225 It should be noted that the existing implementation of the SMC-FCS algorithm does not  
226 cover our substantive model, the propensity score-weighted analysis, consequently, we  
227 decided to use the model for the propensity score as our substantive model. For each  
228 partially observed covariate we specified a “prediction model” meaning a regression

229 model to predict the missing value of a partly observed covariate (the response in the re-  
230 gression model in question) given the PTSD score and any additional covariates as  
231 deemed relevant based on subject matter insight and exploratory plots. When entering  
232 as the response variable, all continuous partially observed covariates were modeled us-  
233 ing linear regression with relevant transformation and all discrete covariates were mod-  
234 eled using logistic, multinomial or proportional odds regression. When entering as “pre-  
235 dictor variables”, all continuous covariates were modeled as restricted cubic splines  
236 with knots at the 10th, 50th and 90th percentiles; all discrete covariates and interactions  
237 entered unaltered (see supplementary materials in (1)). The sampling interval between  
238 the imputations was decided based on plots of the parameter estimates against the sam-  
239 pling interval.

240 To combine propensity score-weighting and multiple imputation to produce the estimate  
241 of association we used the “within” procedure (17,18): a number of data sets were im-  
242 puted, for each data set the prevalence difference of PTSD according to long-distance  
243 migration was estimated and averaged to give the point estimate (“impute, compute,  
244 combine”). The 95-percentile confidence interval was found by bootstrapping this pro-  
245 cedure. The procedure is illustrated in Figure 1.

246 All data management, analysis and plots were done in R (19) with heavy reliance on  
247 packages “smcfcs” (12) for SMC-FCS multiple imputation; “WeightIt” (20) and  
248 “cobalt” (21) for estimation of propensity score weights and assessment of covariate  
249 balance; “boot” (22) for parallelized bootstrapping; “furr” (23) for further parallelizing  
250 procedures; and “tidyverse” packages (24) for data wrangling and plotting. The code

251 was run on two Ubuntu systems (18.04.5 and 20.04.1) and a Windows 10 system; all  
252 running R 4.0.3. The analysis plan and all R code for analysis and plots, including the  
253 specific settings in each procedure are available from <https://github.com/eiset/ARCH>.

## 254 **Results**

255 The simple propensity score model (no interaction terms) with weight truncation at 1st  
256 and 99th percentile obtained acceptable balance on all covariates and was chosen as our  
257 model. Unfortunately, but not surprisingly, we had to modify our first choice of sub-  
258 stantive model (i.e. the propensity score model used in the imputation) due to computa-  
259 tional/numerical problems by collapsing two levels of one of the substantive model co-  
260 variates and two levels of one of the auxiliary covariate (1).

261 This slightly modified propensity score model was the substantive model in the SMC-  
262 FCS multiple imputation and regression models were set up for all partially observed  
263 covariates: For example, for imputing the continuous covariate “Age”, the logarithmic  
264 transformation of Age, “log Age”, was modeled with covariates from the substantive  
265 model entering as predictor variables: “Socioeconomic status”, “PTSD” (as restricted  
266 cubic spline) and auxiliary regressors: “Highest education”, “Number of children”,  
267 “Systolic blood pressure” (as restricted cubic spline), and “Marital status”. The Age  
268 variable was then passively imputed from “log Age” by exponentiating. All partially ob-  
269 served auxiliary variables were also imputed. The “predictor matrix” in Supplemental  
270 Table 1 gives details on models for all partly observed variables.

271 We set the number of imputations to 10 which is well beyond what is often considered  
272 sufficient (25). The convergence plots showed that a sampling interval between imputa-  
273 tions, i.e. iterations, of 20 was sufficient; to err on the safe side, we chose 40 iterations.  
274 Following recommendations of Carpenter and Bithell (14) we produced 999 bootstrap  
275 estimates to compute the 95-percentile confidence interval. For practical reasons, three  
276 different computers were used to run the final analysis. The time to run 250 bootstrap  
277 estimates was from two to 10 hours depending on the system.

278 The analysis showed an increased prevalence amounting to 8.76 percentage points (95-  
279 percentile confidence interval [-1.39; 18.62 percentage points] with little variation in the  
280 sensitivity analysis. We refer to the accompanying paper for discussions of the results  
281 (1).

## 282 **Discussion**

283 In this paper we describe the statistical methodological considerations for combining  
284 propensity score-weighting and multiple imputation of missing data. We discuss the as-  
285 sumptions behind both propensity score-weighted estimation and multiple imputation.

286 In our approach, the substantive model of interest and covariates to include in the  
287 propensity score model was explicit. It has been suggested that machine learning or  
288 “black box” algorithms may provide reasonable propensity score-weights (4,26,27),  
289 however, at the cost of control over the substantive model which is paramount in fulfill-  
290 ing one of the assumptions of multiple imputation: a correctly specified substantive  
291 model of interest. And as Bartlett *et al.* notes “We do not consider the requirement to

292 specify a substantive model at the imputation stage to be a shortcoming...” (11). We  
293 truncated extreme weights as advocated by several (4,16,28), acknowledging that the  
294 decrease in variance comes at the cost of possibly introducing bias. Stabilized weights is  
295 another approach to decrease the variance but comes at a similar cost (29); a recent pa-  
296 per (28) found that when estimating the hazard rate by propensity score-weighted Cox  
297 regression the choice between ordinary propensity score-weighting (in this case using  
298 weights to produce the “average treatment effect”) or its stabilized version made no dif-  
299 ference on the confidence interval coverage and that bootstrap gave the least biased  
300 variance estimates with best confidence interval coverage.

301 The SMC-FCS algorithm (11) allows defining the substantive model of interest and im-  
302 putation models for each partially observed variable and takes care of combining these  
303 in the multiple univariate imputations. This may increase the possibility to define a cor-  
304 rectly specified multiple imputation model. While model misspecification is considered  
305 the overarching source to bias in propensity score modeling (4,30) recent studies sug-  
306 gest that misspecification of the multiple imputation model may not be detrimental in  
307 obtaining valid percentile confidence interval when applying a methodology as pro-  
308 posed in this paper (31). We have based our propensity score model on the available ev-  
309 idence and subject matter knowledge, however, recognize the possibility of some re-  
310 maining bias, for example from residual confounding and from the collapsing of two  
311 levels of one of the substantive model variables. Seaman and White (32) showed that  
312 the “within” procedure as proposed by Qu and Lipkovich (33) gives unbiased point esti-  
313 mates assuming ignorable missingness mechanism and that including a “missing-value

314 indicator variable” in the data set may reduce bias when the missingness mechanism is  
315 not ignorable, however, increase bias when the it is ignorable. We subjected every vari-  
316 able to careful examination and are satisfied that the “everywhere-MAR” assumption is  
317 not violated, however, we acknowledge that this is subject to discussion and cannot be  
318 guaranteed. We used bootstrap to produce a 95-percentile confidence interval taking  
319 into account uncertainty introduced by modeling in both the propensity score and multi-  
320 ple imputation step. Alternatively, the “Rubin’s rule” are used in several studies and are  
321 the traditional choice when doing multiple imputation (without propensity score model-  
322 ing). Qu and Lipkovich (33) noted that “Rubin’s rule” does not account for the uncer-  
323 tainty introduced in the propensity score estimation and, thus, is not valid in theory  
324 while others note that it may produce valid estimates in practice (32). There is no clear  
325 evidence on what step to bootstrap when combining propensity score-weighting and  
326 multiple imputation (34). In our approach, we bootstrapped the entire “within” proce-  
327 dure to produce a confidence interval that accounts for all uncertainty introduced by  
328 modeling. This procedure is similar to that applied to a simple simulated data set with  
329 ignorable missingness mechanism by Penning de Vries and Groenwold (18). Schomaker  
330 and Heumann (34) suggest that bootstrapping after multiply imputing the data sets may  
331 produce similar results at lower computational expense, however, a later study (31)  
332 found that this may increase bias compared with bootstrapping the entire procedure.

333 Our proposed methodology takes several hours to run on “standard” laptop computers  
334 and we experienced numerical problems with strata with relatively few observations.  
335 Going forward, we are eager to examine the sensitivity of our result to different method-



336 ologies for example using other  $g$ -methods such as  $g$ -computation or other multiple im-  
337 putation methods such as machine learning algorithms. The produced point estimate and  
338 confidence interval could also be compared to alternative methods that lowers the com-  
339 puting time such as “Rubin’s rules” or the recently proposed “von Hippel” method for  
340 using bootstrap in multiple imputation (though does not include propensity score model-  
341 ing) (35).

342 In this article we have striven to make clear the many choices that we had to go through  
343 to produce the estimate of interest. It is our hope that others can make use of our experi-  
344 ence in planning their research, creating the analysis plan and running their analysis.

## 345 References

1. Eiset AH, Aoun MP, Stougaard M, et al. The association between post-traumatic stress disorder and long-distance migration: A cross-sectional study of refugee health. *In review*
2. Mollica RF, Caspi-Yavin Y, Bollini P, et al. The Harvard Trauma Questionnaire: Validating a Cross-Cultural Instrument for Measuring Torture, Trauma, and Posttraumatic Stress Disorder in Indochinese Refugees. *J. Nerv.* 1992;180(2):111–116.
3. Brookhart MA, Schneeweiss S, Rothman KJ, et al. Variable Selection for Propensity Score Models. *Am. J. Epidemiol.* 2006;163(12):1149–1156.
4. Lee BK, Lessler J, Stuart EA. Weight Trimming and Propensity Score Weighting. *PLOS ONE.* 2011;6(3):e18174.
5. Seaman SR, Galati J, Jackson D, et al. What Is Meant by “Missing at Random”? *Stat. Sci.* 2013;28(2):257–268.
6. Rubin DB. Inference and Missing Data. *Biometrika.* 1976;63(3):581–592.
7. Little RJA. Regression With Missing X’s: A Review. *J. Am. Stat. Assoc.* 1992;87(420):1227–1237.
8. Rubin DB. Multiple Imputation After 18+ Years. *J. Am. Stat. Assoc.* 1996;91(434):473–489.
9. Sterne JAC, White IR, Carlin JB, et al. Multiple imputation for missing data in epidemiological and clinical research: potential and pitfalls. *BMJ* [electronic article]. 2009;338. (<http://www.ncbi.nlm.nih.gov/pmc/articles/PMC2714692/>). (Accessed June 24, 2015)

10. Seaman SR, Bartlett JW, White IR. Multiple imputation of missing covariates with non-linear effects and interactions: an evaluation of statistical methods. *BMC Med. Res. Methodol.* 2012;12:46.
11. Bartlett JW, Seaman SR, White IR, et al. Multiple imputation of covariates by fully conditional specification: Accommodating the substantive model. *Stat. Methods Med. Res.* 2015;24(4):462–487.
12. Bartlett JW, Keogh R. smcfcs: Multiple Imputation of Covariates by Substantive Model Compatible Fully Conditional Specification. 2020.(<https://CRAN.R-project.org/package=smcfcs>)
13. Bartlett JW, Morris TP. Multiple Imputation of Covariates by Substantive-model Compatible Fully Conditional Specification. *Stata J. Promot. Commun. Stat. Stata.* 2015;15(2):437–456.
14. Carpenter J, Bithell J. Bootstrap confidence intervals: when, which, what? A practical guide for medical statisticians. *Stat. Med.* 2000;19(9):1141–1164.
15. Austin PC. Balance diagnostics for comparing the distribution of baseline covariates between treatment groups in propensity-score matched samples. *Stat. Med.* 2009;28(25):3083–3107.
16. Austin PC, Stuart EA. Moving towards best practice when using inverse probability of treatment weighting (IPTW) using the propensity score to estimate causal treatment effects in observational studies. *Stat. Med.* 2015;34(28):3661–3679.
17. Leyrat C, Seaman SR, White IR, et al. Propensity score analysis with partially observed covariates: How should multiple imputation be used? *Stat. Methods Med. Res.* 2019;28(1):3–19.
18. Penning de Vries BBL, Groenwold RH. A comparison of two approaches to implementing propensity score methods following multiple imputation. *Epidemiol. Biostat. Public Health* [electronic article]. 2017;14(4). (<https://ebph.it/article/view/12630>). (Accessed October 30, 2019)
19. R Core Team. R: A Language and Environment for Statistical Computing. Vienna, Austria: R Foundation for Statistical Computing; 2020.(<http://www.R-project.org/>)
20. Greifer N. WeightIt: Weighting for Covariate Balance in Observational Studies. 2020.(<https://CRAN.R-project.org/package=WeightIt>)
21. Greifer N. cobalt: Covariate Balance Tables and Plots. 2020.(<https://CRAN.R-project.org/package=cobalt>)
22. Canty A, Ripley B. boot: Bootstrap R (S-Plus) Functions. 2020.
23. Vaughan D, Dancho M. furr: Apply Mapping Functions in Parallel using Futures. 2020.(<https://CRAN.R-project.org/package=furr>)
24. Wickham H, Averick M, Bryan J, et al. Welcome to the Tidyverse. *J. Open Source Softw.* 2019;4(43):1686.
25. Harrell F. Regression Modeling Strategies: With Applications to Linear Models, Logistic and Ordinal Regression, and Survival Analysis. 2nd ed. Springer International Publishing; 2015 (Accessed February 15, 2019).( <https://www.springer.com/la/book/9783319194240>). (Accessed February 15, 2019)

26. Bahamyrou A, Blais L, Forget A, et al. Understanding and diagnosing the potential for bias when using machine learning methods with doubly robust causal estimators. *Stat. Methods Med. Res.* 2019;28(6):1637–1650.
27. Penning de Vries BBL, Smeden M van, Groenwold RHH. Propensity Score Estimation Using Classification and Regression Trees in the Presence of Missing Covariate Data. *Epidemiol. Methods* [electronic article]. 2018;7(1). (<https://www.degruyter.com/view/j/em.2018.7.issue-1/em-2017-0020/em-2017-0020.xml>). (Accessed December 4, 2019)
28. Austin PC. Variance estimation when using inverse probability of treatment weighting (IPTW) with survival analysis. *Stat. Med.* 2016;35(30):5642–5655.
29. Cole SR, Hernán MA. Constructing Inverse Probability Weights for Marginal Structural Models. *Am. J. Epidemiol.* 2008;168(6):656–664.
30. Austin PC, Stuart EA. The performance of inverse probability of treatment weighting and full matching on the propensity score in the presence of model misspecification when estimating the effect of treatment on survival outcomes. *Stat. Methods Med. Res.* [electronic article]. 2017; (<https://journals.sagepub.com/doi/10.1177/0962280215584401>). (Accessed March 8, 2020)
31. Bartlett JW, Hughes RA. Bootstrap inference for multiple imputation under uncongeniality and misspecification: *Stat. Methods Med. Res.* [electronic article]. 2020;(<https://journals.sagepub.com/doi/10.1177/0962280220932189>). (Accessed August 13, 2020)
32. Seaman SR, White I. Inverse Probability Weighting with Missing Predictors of Treatment Assignment or Missingness. *Commun. Stat. - Theory Methods.* 2014;43(16):3499–3515.
33. Qu Y, Lipkovich I. Propensity score estimation with missing values using a multiple imputation missingness pattern (MIMP) approach. *Stat. Med.* 2009;28(9):1402–1414.
34. Schomaker M, Heumann C. Bootstrap inference when using multiple imputation. *Stat. Med.* 2018;37(14):2252–2266.
35. von Hippel PT, Bartlett JW. Maximum likelihood multiple imputation: Faster imputations and consistent standard errors without posterior draws. *ArXiv12100870 Stat* [electronic article]. 2019; (<http://arxiv.org/abs/1210.0870>). (Accessed January 26, 2020)

347 **Tables**

348 **Table 1:** Considerations and decision for building the propensity score model

| Problem                                              | Theory                                                                                                                                                                                                                                                                                                                                                                                      | Considerations                                                                                                                                                                                                                                                                                                                                                                                             | Decision                                                                                                                                                            |
|------------------------------------------------------|---------------------------------------------------------------------------------------------------------------------------------------------------------------------------------------------------------------------------------------------------------------------------------------------------------------------------------------------------------------------------------------------|------------------------------------------------------------------------------------------------------------------------------------------------------------------------------------------------------------------------------------------------------------------------------------------------------------------------------------------------------------------------------------------------------------|---------------------------------------------------------------------------------------------------------------------------------------------------------------------|
| What covariates should be included in the model?     | Confounders and potential confounders must be included in the propensity score model                                                                                                                                                                                                                                                                                                        | Subject matter knowledge and thorough discussions in the group of authors were undertaken including drawing the assumed association in a directed acyclic graph.                                                                                                                                                                                                                                           | Data were collected on variables of interest including age, sex, mental health status, exposure to violence, socioeconomic status.                                  |
| What complexity of the model to use in the analysis? | Increasing model complexity should be examined to chose the model that obtain covariate “balance” between exposure groups. This is generally assessed subjectively. There are some consensus that balance is obtained when the standardized absolute mean difference are < 0.10 for all covariates.                                                                                         | Three models of increasing complexity was defined <i>a priori</i> . A threshold of 0.10 was used to define balance of covariates between exposure groups. For each combination of model complexity the missing data was imputed once and covariate balance was plotted. The least complex model with the least truncation that obtained balance were chosen as the propensity score model in the analysis. | The propensity score model with no interaction terms (i.e. the “simple” model). Because of numerical issues two levels of two categorical variables were collapsed. |
| How to handle extreme weights?                       | For example truncation, i.e. forcing extreme weights to a given threshold, shrinkage, i.e. “pushing” all weights towards the mean altering extreme weights relatively more than weights closer to the mean, or penalization, i.e. constraining the coefficients of the propensity score model which will result in less extreme predicted chance of exposure and thus less extreme weights. | To lower the complexity of the methodology we focused on truncation. Sets of truncation percentiles at 0 & 100, 1 & 99, and 5 & 95 were examined for each of the three complexities of the model                                                                                                                                                                                                           | Truncation at 1st and 99th percentiles.                                                                                                                             |

349

350

351 **Table 2:** Considerations and decision for building the multiple imputation model

| Problem                                                                  | Theory                                                                                                                                                                                                                    | Considerations                                                                                                                                                                                                                                                                                                                                                                                                                                                                             | Decision                                                                                                                                                                                                                                                                                                                                                                                                                                                                                                                                                     |
|--------------------------------------------------------------------------|---------------------------------------------------------------------------------------------------------------------------------------------------------------------------------------------------------------------------|--------------------------------------------------------------------------------------------------------------------------------------------------------------------------------------------------------------------------------------------------------------------------------------------------------------------------------------------------------------------------------------------------------------------------------------------------------------------------------------------|--------------------------------------------------------------------------------------------------------------------------------------------------------------------------------------------------------------------------------------------------------------------------------------------------------------------------------------------------------------------------------------------------------------------------------------------------------------------------------------------------------------------------------------------------------------|
| Is the missingness mechanism ignorable?                                  | For multiple imputation to produce unbiased estimates the missingness mechanism must be ignorable. In a frequentist framework this means the data must be “everywhere-missing-at-random”.                                 | The “everywhere-missing-at-random” assumption was assessed using exploratory plotting and subject matter knowledge for all partly observed covariates.                                                                                                                                                                                                                                                                                                                                     | After careful consideration of all partly observed variables we deemed that the missingness mechanism was approximately ignorable.                                                                                                                                                                                                                                                                                                                                                                                                                           |
| What implementation of multiple imputation to use?                       | Many exist and are available in standard software. Commonly used are variations of “chained equation” algorithms.                                                                                                         | The implementation should be available in some form as an R package and should allow for adaptation and configuration to our specific use.                                                                                                                                                                                                                                                                                                                                                 | The chained-equation method “SMC-FCS” as implemented in the R package “smcfcs”.                                                                                                                                                                                                                                                                                                                                                                                                                                                                              |
| What should be used as the substantive model in the multiple imputation? | The substantive model of interest must be correctly specified and in accordance with (congenial with) the model for the analysis of interest. This is a crucial step of multiple imputation where bias may be introduced. | The model for the estimate of interest was a simple univariate binomial regression with weights computed from the propensity score model. The smcfcs package, however, requires the substantive model to be defined as a regression model and does not allow a weighted model as the substantive model. The propensity score model to compute the weights contained the covariates deemed important to control for confounding.                                                            | The propensity score model was used as the “substantive model” in the multiple imputation.                                                                                                                                                                                                                                                                                                                                                                                                                                                                   |
| What variables to include in the multiple imputation models?             | The variables used in the “prediction models” for each of the partly observed variables should include strong predictors for the variable entering as the response.                                                       | The propensity score model includes all covariates that are considered important in describing the relationship between the exposure and the outcome of interest. However, this model does not contain the outcome of interest, which is paramount to include in the multiple imputation models. Variables that are strong predictors for a partly observed covariate but not part of the substantive model (i.e. the propensity score model) should be included as an auxiliary variable. | All variables in the propensity score model (see above) was automatically added in the multiple imputation of each of the partly observed covariates using the SMC-FCS-procedure. Furthermore, a “prediction model matrix” containing information on how to impute all partly observed variables were created (see the Supplemental Table 1 “predictor matrix”). The outcome of interest (the PTSD-score) was included in all “prediction models” for partly observed covariates but not necessarily in the “prediction models” for the auxiliary variables. |
| How many iterations must be run between sampling?                        | Because of the chained-equation algorithm successive iterations are not independent. The distance between iterations must be decided so that independence, i.e. convergence, is approached.                               | Convergence was assessed by plotting the parameter estimates for each iteration for each of the covariates in the propensity score model. When reaching a stable distribution of all variables independence was obtained.                                                                                                                                                                                                                                                                  | The plots indicated that a distance of 20 iterations was sufficient, however, to err on the safe side, we chose a distance of 40 iterations                                                                                                                                                                                                                                                                                                                                                                                                                  |

352 Abbreviations: PTSD, post-traumatic stress disorder; SMC-FCS, Substantive Model

353 Compatible-Full Conditional Specification.

354 **Table 3:** Consideration and decision for combining multiple imputation and propensity  
 355 score-weighting and obtaining valid confidence interval

|  | <b>Problem</b>                                                       | <b>Theory</b>                                                                                                  | <b>Considerations</b>                                                                                                                                                                                                                                                                                                                                                                                                                  | <b>Decision</b>                                                                                                                                                                                              |                                                                                                                                                                                                                                                       |
|--|----------------------------------------------------------------------|----------------------------------------------------------------------------------------------------------------|----------------------------------------------------------------------------------------------------------------------------------------------------------------------------------------------------------------------------------------------------------------------------------------------------------------------------------------------------------------------------------------------------------------------------------------|--------------------------------------------------------------------------------------------------------------------------------------------------------------------------------------------------------------|-------------------------------------------------------------------------------------------------------------------------------------------------------------------------------------------------------------------------------------------------------|
|  | Combining multiple imputation and propensity score-weighted analysis | What sequence of multiple imputation and propensity score-weighted analysis should be implemented?             | The “within” procedure (impute the missing data, compute the propensity score-weights and the estimate of association, combine by taking the average to produce the estimate of association) has been proposed as less prone to introduce bias compared with the “across” procedure (impute the missing data, compute the propensity score, combine the propensity scores by taking the average, compute the estimate of association). | The “within” procedure was implemented.                                                                                                                                                                      |                                                                                                                                                                                                                                                       |
|  | Obtaining confidence interval                                        | How to account for the uncertainty introduced in both the multiple imputation and propensity score estimation? | Rubin’s rules with modification to large-sample variance estimator or bootstrap has been proposed.                                                                                                                                                                                                                                                                                                                                     | There are some theoretical evidence that bootstrap produces valid estimates of uncertainty in implementations such as the one we propose, however, it has received little attention in applied epidemiology. | Bootstrapping of the “within” procedure was decided upon.                                                                                                                                                                                             |
|  | Bootstrapping                                                        | What type of bootstrap confidence interval and how many bootstraps to produce the confidence interval?         | Several types of bootstrap confidence intervals have been proposed, among others the normal, percentile and BCa. For the prior a relatively low number of bootstraps are sufficient, however, it relies on the normal distribution of the estimates. The latter requires a much larger number of repeats, often at least 1000 and are thus computationally intensive.                                                                  | The percentile type requires less repetitions than the BCa and relaxes the distributional assumption of the normal bootstrap somewhat, however, may still be severely biased in a skewed distribution.       | The percentile method with 999 bootstrap samples was used. To assess the influence of the bootstrap confidence interval type on the interpretation of the result we produced four different confidence intervals (normal, basic, percentile and BCa). |
|  |                                                                      | How many data sets should be imputed for each bootstrap?                                                       | Since we are using bootstrap to calculate the confidence interval the number of imputations for each missing data point can be kept to a minimum, some recommending as little as two.                                                                                                                                                                                                                                                  | We had a relatively high proportion of missing in several variables and for several observations.                                                                                                            | The number of imputations was chosen to 10.                                                                                                                                                                                                           |

356

## 357 Figure legends

358 **Figure 1: Flow-chart of proposed methodology to combine multiple imputation**

359 **and propensity score weighting**

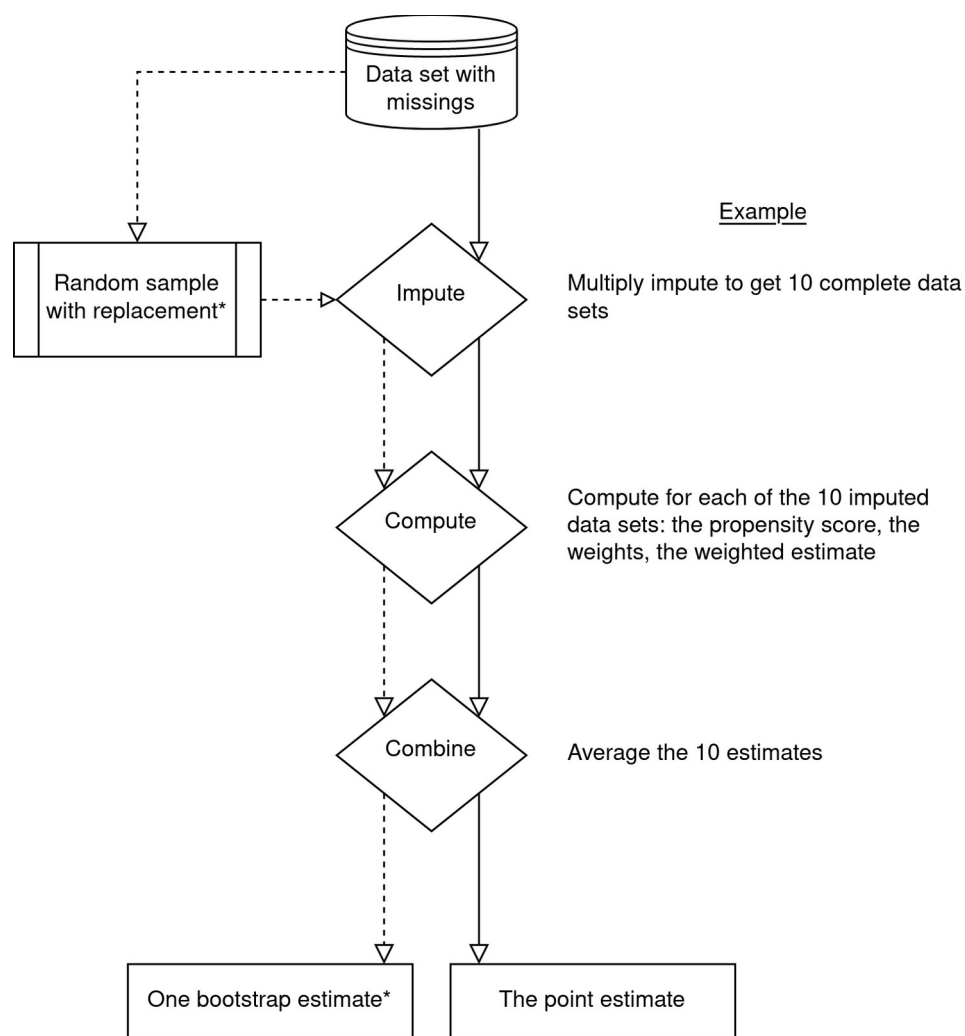

360 \*The bootstrap is repeated multiple times, for example 1000, to be able to estimate the

361 95-percentile confidence interval.
