# Supplementary material for: Considerations for using multiple imputation in propensity score-weighted analysis
Source: bioRxiv or medRxiv preprint supplement (doi:10.1101/2021.06.30.21259793), 2021-07-05
Supplement: Supplementary file [file media-1.pdf]

**Supplemental Table 1: Predictor matrix**

| Type | Response        | Predictors |         |     |        |     |               |          |     |        |               |         |      |     |      |         |     |       |      |        |    |       |         |     |        |
|------|-----------------|------------|---------|-----|--------|-----|---------------|----------|-----|--------|---------------|---------|------|-----|------|---------|-----|-------|------|--------|----|-------|---------|-----|--------|
|      |                 | migr       | age_log | age | age_sb | sex | sexFemale:age | who_sqrt | who | who_sb | who:sexFemale | who:age | viol | ses | ptsd | ptsd_sb | edu | child | smok | bp_log | bp | bp_sb | hgt_log | hgt | hgt_sb |
| b    | <i>migr</i>     |            |         |     |        |     |               |          |     |        |               |         |      |     |      |         |     |       |      |        |    |       |         |     |        |
| c    | <i>age_log</i>  |            |         |     |        |     |               |          |     |        |               |         |      |     |      |         |     |       |      |        |    |       |         |     |        |
| pas  | age             |            | 1       |     |        |     |               |          |     |        |               |         |      | 1   | 1    | 1       | 1   | 1     |      |        |    | 1     | 1       |     |        |
| pas  | age_sb          |            |         | 1   |        |     |               |          |     |        |               |         |      |     |      |         |     |       |      |        |    |       |         |     |        |
| b    | <i>sex</i>      |            |         |     |        |     |               |          |     |        |               |         |      |     |      |         |     |       | 1    |        | 1  | 1     |         | 1   | 1      |
| pas  | sexFemale:age   |            |         | 1   |        | 1   |               |          |     |        |               |         |      |     |      |         |     |       |      |        |    |       |         |     |        |
| c    | <i>who_sqrt</i> |            |         | 1   | 1      | 1   | 1             |          |     |        |               |         | 1    | 1   | 1    | 1       |     |       |      |        |    |       |         |     |        |
| pas  | who             |            |         |     |        |     |               | 1        |     |        |               |         |      |     |      |         |     |       |      |        |    |       |         |     |        |
| pas  | who_sb          |            |         |     |        |     |               |          | 1   |        |               |         |      |     |      |         |     |       |      |        |    |       |         |     |        |
| pas  | who:sexFemale   |            |         |     |        | 1   |               |          |     | 1      |               |         |      |     |      |         |     |       |      |        |    |       |         |     |        |
| pas  | who:age         |            |         | 1   |        |     |               |          |     | 1      |               |         |      |     |      |         |     |       |      |        |    |       |         |     |        |
| b    | <i>viol</i>     |            |         | 1   | 1      | 1   | 1             |          | 1   | 1      | 1             |         |      |     | 1    | 1       |     |       |      |        |    |       |         |     |        |
| o    | <i>ses</i>      |            |         | 1   | 1      | 1   | 1             | 1        | 1   | 1      | 1             |         |      |     | 1    | 1       |     |       | 1    |        |    |       |         |     |        |
| c    | <i>ptsd</i>     |            |         | 1   | 1      | 1   | 1             |          | 1   | 1      | 1             |         | 1    | 1   | 1    |         |     |       |      |        |    |       |         |     |        |
| pas  | ptsd_sb         |            |         |     |        |     |               |          |     |        |               |         |      |     | 1    |         |     |       |      |        |    |       |         |     |        |
| o    | <i>edu</i>      |            |         | 1   | 1      | 1   | 1             |          |     |        |               |         | 1    |     |      |         |     |       |      |        |    |       |         |     |        |
| o    | <i>child</i>    | 1          |         | 1   | 1      | 1   | 1             |          |     |        |               |         | 1    |     |      |         | 1   |       |      |        |    | 1     | 1       |     |        |
| b    | <i>smok</i>     | 1          |         |     |        | 1   |               |          |     |        | 1             | 1       |      |     |      |         |     |       |      |        |    | 1     | 1       |     | 1      |
| c    | <i>bp_log</i>   |            |         | 1   | 1      | 1   | 1             |          |     |        |               |         |      |     |      |         |     |       |      |        |    |       |         |     |        |
| pas  | bp              |            |         |     |        |     |               |          |     |        |               |         |      |     |      |         |     |       | 1    |        |    |       |         |     |        |
| pas  | bp_sb           |            |         |     |        |     |               |          |     |        |               |         |      |     |      |         |     |       |      |        |    | 1     |         |     |        |
| c    | <i>hgt_log</i>  |            |         |     |        | 1   |               |          |     |        |               |         |      |     | 1    | 1       |     |       | 1    |        |    | 1     | 1       |     |        |
| pas  | hgt             |            |         |     |        |     |               |          |     |        |               |         |      |     |      |         |     |       |      |        |    |       | 1       |     |        |
| pas  | hgt_sb          |            |         |     |        |     |               |          |     |        |               |         |      |     |      |         |     |       |      |        |    |       |         | 1   |        |

The predictor matrix details how each partially observed variable was imputed. Horizontally the variables enter as the response, vertically the variables enter as the predictor when the corresponding cell is “1”. The “type” column indicate how the variables should be modelled when entering as the response variable (b, binary; c, continuous; pas, passive; o, ordered/ordinal; u, unordered/nominal). Variables in red are part of the substantive model (the propensity score model); variables in italic are actively imputed. “:” denotes interaction between the variables on each side.
